# Supplementary material
Source: Springer Nature journal article supplement (https://www.springermedizin.de/resource/supplementary/12936_2013_2782_MOESM4_ESM.pdf/9544254)

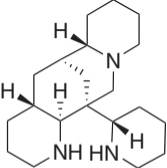

1

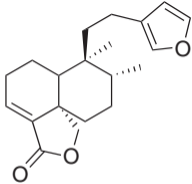

2

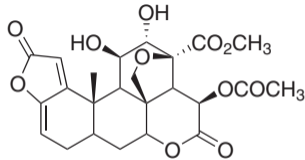

3

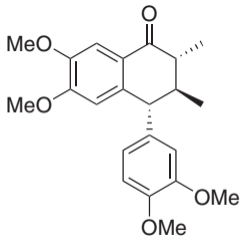

4

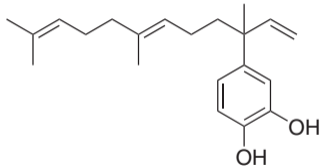

5

Supplement: MOESM4 [file 9544254]
